# Supplementary material for: Lactobacillus rhamnosus LC-STH-13 ameliorates the progression of SLE in MRL/lpr mice by inhibiting the TLR9/NF-κB signaling pathway
Source: Royal Society of Chemistry journal article supplement (doi:10.1039/d4fo03966a), 2024-12-18
Supplement: d4fo03966a1.pdf [file d4fo03966a1.pdf]

### Supplementary tables

Table S1. The information of primers

| <b>cytokin es</b> | <b>Forward prime Sequences</b>        | <b>Reverse prime Sequences</b>        |
|-------------------|---------------------------------------|---------------------------------------|
| GAPDH             | 5'-<br>CATCACTGCCACCCAGAAGA<br>CTG-3' | 5'-<br>ATGCCAGTGAGCTTCCCGTT<br>CAG-3' |
| IL-1 $\beta$      | 5'-<br>GTGTCTTTCCCGTGGACCTTC<br>-3'   | 5'-<br>TCATCTCGGAGCCTGTAGTG<br>C-3'   |
| IL-6              | 5'-GAAATCGTGGAAATGAG-3'               | 5'-GCTTAGGCATAACGCACT-<br>3'          |
| TNF- $\alpha$     | 5'-<br>GTGGA ACTGGCAGAAGAGGC<br>A-3'  | 5'-<br>AGAGGGAGGCCATTTGGGAA<br>C-3'   |
| IFN- $\alpha$ 1   | 5'-<br>GGATGTGACCTTCCTCAGACT<br>C -3' | 5'-<br>ACCTTCTCCTGCGGGAATCC<br>AA-3'  |

Table S2. Bacteriostatic diameters of 9 common antibiotics

| <b>Drug sensitivity tablet</b> | <b>Drug content</b> | <b>Judgment of the diameter of the inhibition circle (cm)</b> |
|--------------------------------|---------------------|---------------------------------------------------------------|
| Lincomycin (MY)                | 2 $\mu$ g           | 0.80 $\pm$ 0.05 (R)                                           |
| Ciprofloxacin (SXT)            | 25 $\mu$ g          | 0.60 (R)                                                      |
| Cotrimoxazole (CIP)            | 5 $\mu$ g           | 0.80 $\pm$ 0.10 (R)                                           |
| Ceftriaxone (CTR)              | 30 $\mu$ g          | 1.12 $\pm$ 0.15 (S)                                           |
| Gentamycin (GEN)               | 10 $\mu$ g          | 0.75 $\pm$ 0.09 (R)                                           |
| Ampicillin (AMP)               | 10 $\mu$ g          | 1.52 $\pm$ 0.16 (S)                                           |
| Penicillin (PEN)               | 10 U                | 1.98 $\pm$ 0.46 (S)                                           |
| Erythromycin (E)               | 15 $\mu$ g          | 1.97 $\pm$ 0.21 (S)                                           |
| Tetracycline (TET)             | 30 $\mu$ g          | 2.6 $\pm$ 0.17 (S)                                            |
| Chloromycetin (C)              | 30 $\mu$ g          | 2.27 $\pm$ 0.32 (S)                                           |

In accordance with the 2019 CLSI M100 29th and EUCAST Clinical Breakpoint Tables V.9.0 standard, D > 10 mm is considered sensitive (S), the opposite is considered resistant (R).
